# Supplementary material for: DNA Repair Gene Polymorphisms and Susceptibility to Urothelial Carcinoma in a Southeastern European Population
Source: MDPI journal article supplement (doi:10.3390/curroncol28030174), 2021-05-14
Supplement: s1 [file s1]

**Supplementary Table 1.** Polymerase chain reaction (PCR) amplification conditions.

| PCR program   | Temperature (°C) | Time (minutes) | Cycles |
|---------------|------------------|----------------|--------|
| Denaturation  | 94               | 05:00          | 1      |
| Amplification | 94               | 00:30          | 35     |
|               | 64               | 01:00          |        |
|               | 72               | 01:00          |        |
| Extension     | 72               | 10:00          | 1      |
| Cooling       | 4                | ∞              |        |

**Supplementary Table 2.** 5' → 3' primer sequences for each SNP studied.

| SNP                | Primer  | 5' – 3' sequence                    |
|--------------------|---------|-------------------------------------|
| XPC PAT +/-        | Forward | TAGCCAGCAGTCAAAG                    |
|                    | Reverse | TGTGAATGTGCTTAATGCTG                |
| XRCC3<br>Thr241Met | Forward | GCCTGGTGGTCATCGACTG                 |
|                    | Reverse | CAGGGCTCTGGAAGGCACTGCTCAGCTCACGCACC |
| XPD<br>Lys751Gln   | Forward | GCCCGCTCTGGATTATACG                 |
|                    | Reverse | CTATCATCTCCTGGCCCCC                 |

**Supplementary Table 3.** Genes, SNPs, restriction enzymes used, and sizes of genotypes in base pairs (bp).

| Gene  | SNP      | RefSeq ID              | Restriction Enzyme | Wild type genotype | SNP genotype    |
|-------|----------|------------------------|--------------------|--------------------|-----------------|
| XPD   | rs13181  | NM_000400.3: c.2251A>T | PstI               | 290 + 146 bp       | 229+ 146+ 63 bp |
| XRCC3 | rs861539 | NM_005432.3: c.722C>T  | NcoI               | 136 bp             | 97+ 39 bp       |
